# Supplementary material for: Multi-scale and multi-site resampling of a study area in spatial genetics: implications for flying insect species
Source: PeerJ journal article supplement (doi:10.7717/peerj.4135), 2017-12-15

Mean number of individuals in sampling areas

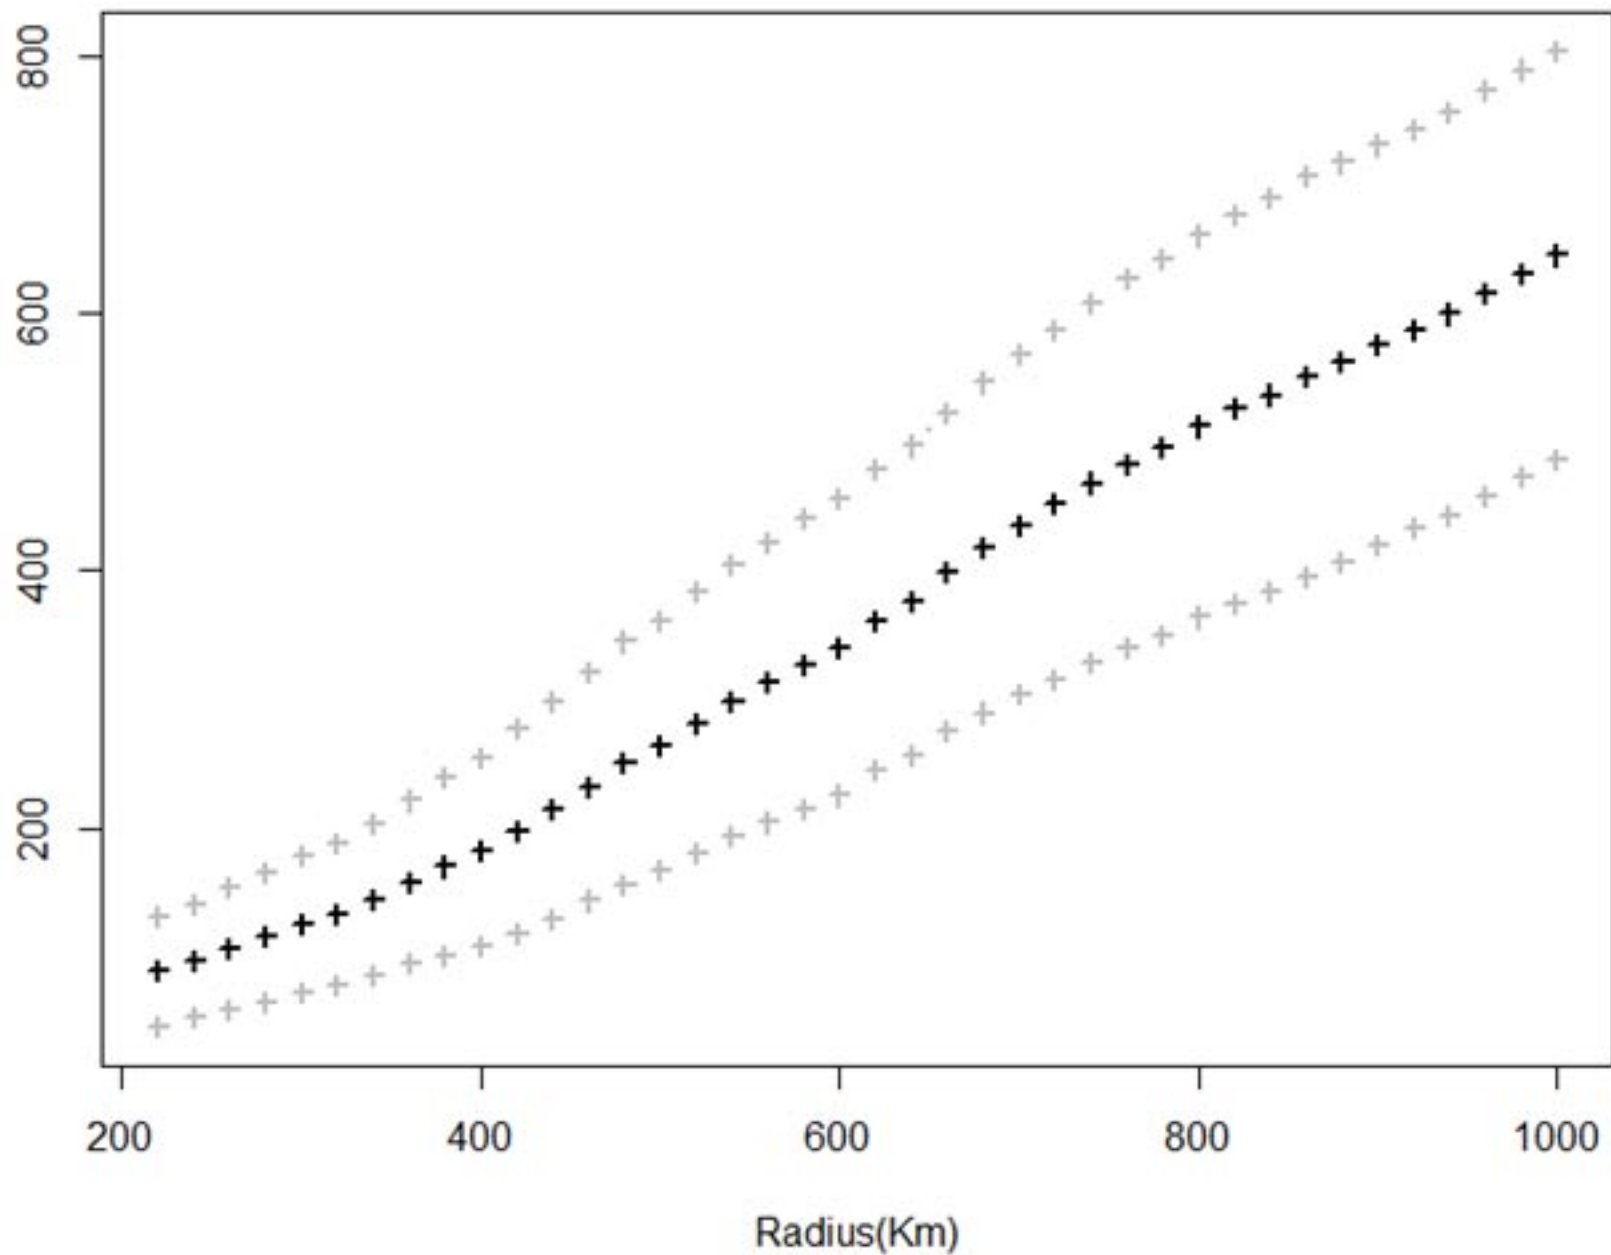

Supplement: Figure_S2.pdf [file Figure_S2.pdf]
